# Supplementary material for: Integrin α3β1 regulates kidney collecting duct development via TRAF6-dependent K63-linked polyubiquitination of Akt
Source: PubMed Central journal article supplement — Mol Biol Cell. 2015 May 15;26(10):1857–74. doi: 10.1091/mbc.E14-07-1203 (PMC4436831; doi:10.1091/mbc.e14-07-1203), 2015-05-15
Supplement: supp_E14-07-1203v1_CombinedSupMats.pdf [file supp_E14-07-1203v1_CombinedSupMats.pdf]

# Supplemental Materials

*Molecular Biology of the Cell*

Yazlovitskaya et al.

**A**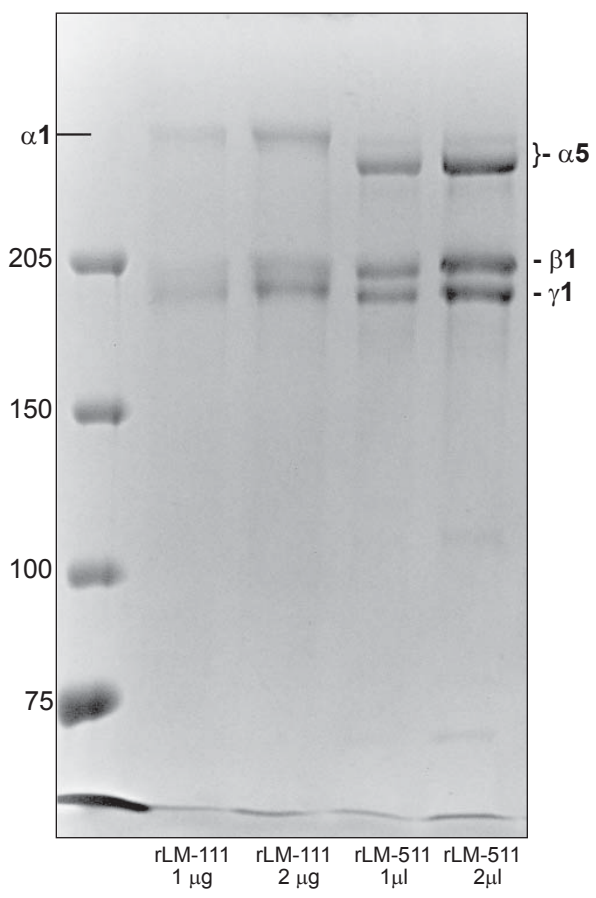**B**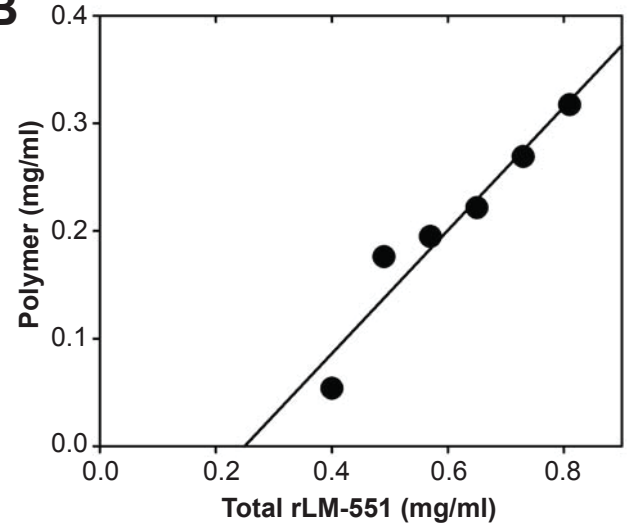**C**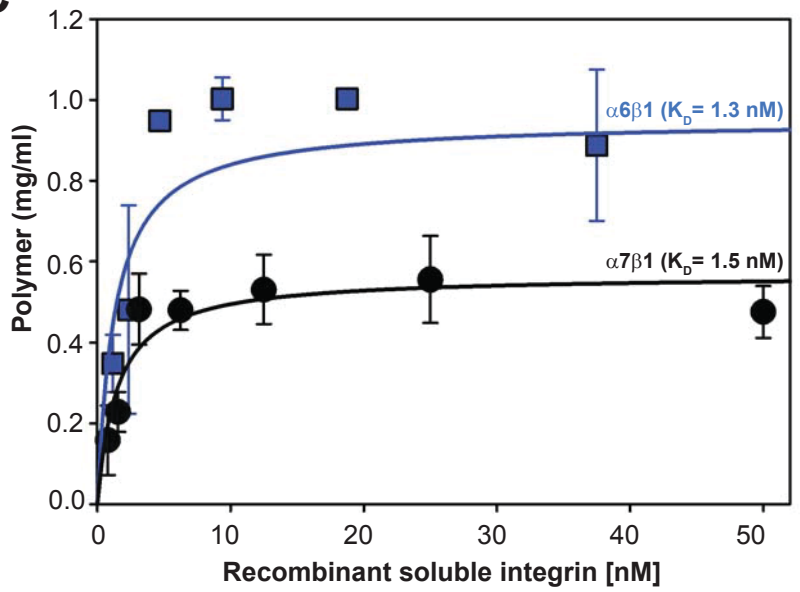

Supplementary Fig. 1

**A**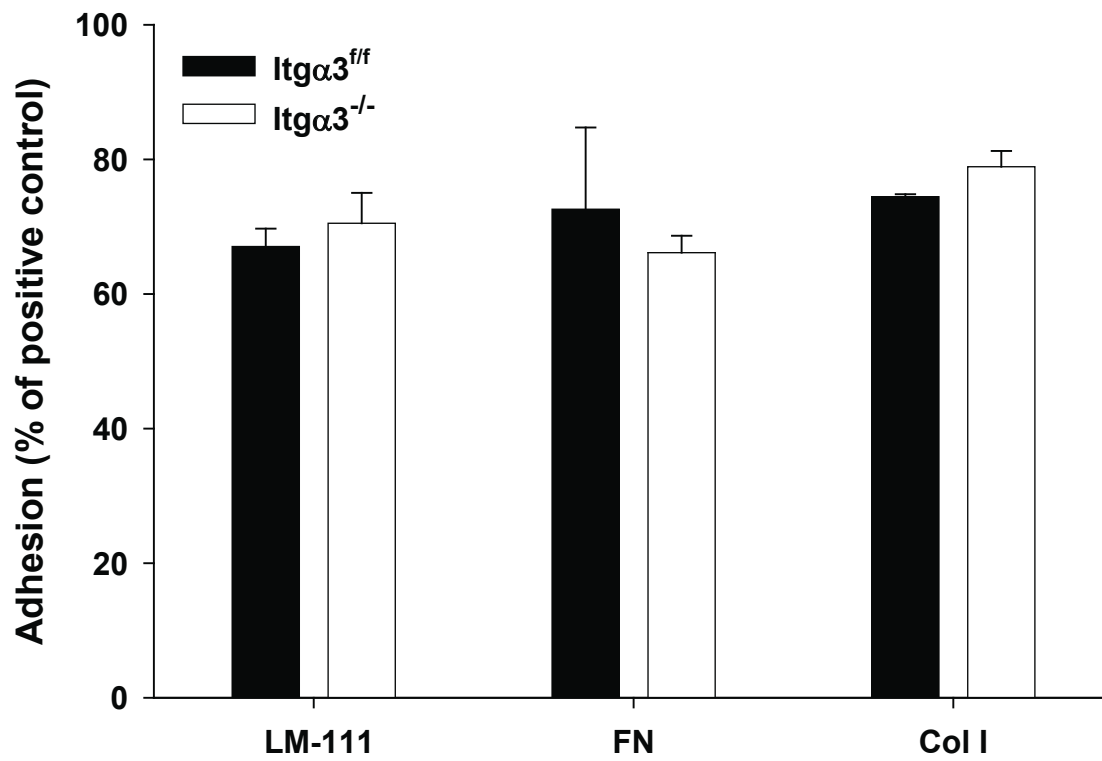**B**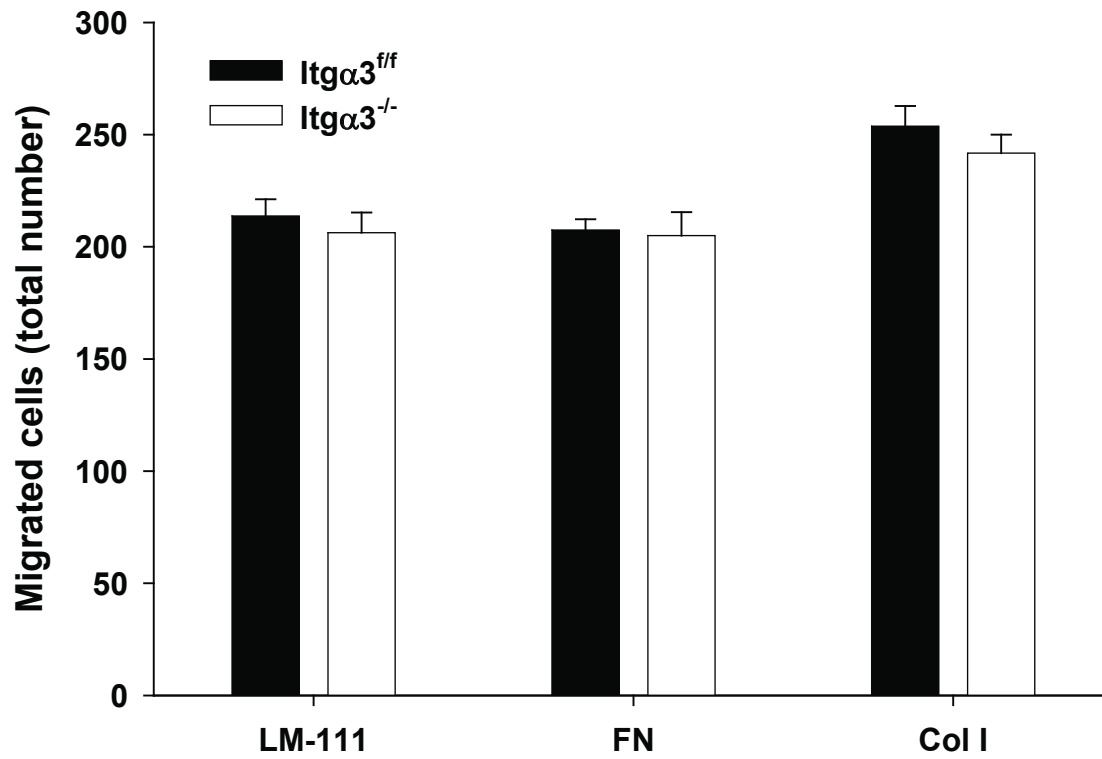

**Supplementary Figure 1. Characterization of produced LM-511.** (A) The homogeneity of purified LM-511 was confirmed by Coomassie blue staining of SDS-PAGE (7.5%, reduced). (B) The correct folding of LM-511 was confirmed by a polymerization assay. Recombinant LM511 was incubated in the presence of 1 mM calcium at 37 °C followed by centrifugation. Shown is a plot of the concentration of polymer as a function of total laminin concentration. (C) LM-511 activity was assessed by binding with recombinant integrins  $\alpha7\beta1$  (circles) and  $\alpha6\beta1$  (squares). The LM-511 was coated onto high binding dishes (Costar) at 10 nM in 40 mM sodium bicarbonate buffer, pH 9.6. The plate was blocked with TTBS (50mM Tris pH 7.4, 90mM NaCl, 0.02% tween 20, + 1% BSA and 1mM MnCl<sub>2</sub>), then soluble integrin was bound in the same buffer for 2 hours at room temperature. The bound integrin was detected with biotinylated rabbit anti-Velcro antibody (ACID/BASE coiled coil, 1:1000 dilution), followed by HRP-conjugated streptavidin (1 mg/ml) and then developed with TMB (Thermo Scientific).

**Supplementary Figure 2. Integrin  $\alpha3\beta1$  is not essential for CD cell adhesion and migration on LM-111, fibronectin (FN) and collagen I (Col I).** Adhesion (A) and migration (B) on LM-111, FN and Col I were evaluated as described in Methods. Mean measurements  $\pm$ SEM of 4-6 independent experiments are shown.
